# Supplementary material for: The etiology of Down syndrome: Maternal MCM9 polymorphisms increase risk of reduced recombination and nondisjunction of chromosome 21 during meiosis I within oocyte
Source: PLoS Genet. 2021 Mar 22;17(3):e1009462. doi: 10.1371/journal.pgen.1009462 (PMC8021012; doi:10.1371/journal.pgen.1009462)
Supplement: S1 Table — (XLSX) [file pgen.1009462.s001.xlsx]

## Sheet: Sheet1
Variants	PolyPhen 2			Mutation taster			Provean		SIFT
	Amino	Status	HumVar	Status	Model	Probability (P)	Status	Score	Status	Score
	Acid change		Value					(cutoff=-2.5)		(cutoff=0.05)
rs114000233	Non coding	-	-	Disease causing	Without_aae	1	-	-	-	-
T>G
rs62422268 C>G	Non coding	-	-	Polymorphism	Without_aae	1	-	-	-	-
rs62422266 T>C	Non coding	-	-	Polymorphism	Without_aae	1	-	-	-	-
MK647975 G>A	Synonymous variant	-	-	Disease causing	Without_aae	1	-	-	-	-
MK647976 G>A	D35N	Benign	0.006	Disease causing	Simple_aae	1	Neutral	-0.648	Tolerated	0.858
MK647977	Synonymous variant	-	-	Disease causing	Without_aae	1	-	-	-	-
G>A
MK647978 G>C	A77P	Damaging	0.884*	Disease causing	Simple_aae	1	Neutral	-2.456	Tolerated	0.858
rs531682044 G>A	R74Q	Benign	0.007	Polymorphism	Simple_aae	1	Neutral	-1.124	Tolerated	0.724
rs73521381 T>G	Synonymous	-	-	Polymorphism	Without_aae	1	-	-	-	-
	Variant
rs1370486625 G>T	Intron variant	-	-	Polymorphism	Without_aae	1	-	-	-	-
rs1267215855 T>C	Synonymous	-	-	Disease causing	Without_aae	1	-	-	-	-
rs1331061317 G>A	Synonymous	-	-	Disease causing	Without_aae	1	-	-	-	-
rs375494814 T>C	Synonymous	-	-	Disease causing	Without_aae	1	-	-	-	-
rs1486475303 C>A	Synonymous	-	-	Disease causing	Without_aae	1	-	-	-	-
rs573678849 G>A	Synonymous	-	-	Disease causing	Without_aae	0.999	-	-	-	-
rs370725680 T>C	Synonymous	-	-	Disease causing	Without_aae	0.999	-	-	-	-
rs140838152 A>G	E108V	Damaging	0.998*	Disease causing	Simple_aae	0.999	Deleterious	-5.96*	Damaging	0.001*
rs576382724 A>C	H122P	Benign	0.249	Disease causing	Simple_aae	0.999	Deleterious	-4.51*	Tolerated	0.226
rs367896634 G>C	R132Q	Damaging	1*	Disease causing	Simple_aae	0.999	Deleterious	-3.69*	Damaging	0.000*
rs1322432805 G>A	K137N	Damaging	0.997*	Disease causing	Simple_aae	0.999	Deleterious	-4.51*	Damaging	0.002*
rs1316687536 T>G	V138A	Benign	0.228	Disease causing	Simple_aae	0.999	Deleterious	-3.06*	Damaging	0.006*
rs1364710617 T>G	C147R	Damaging	1*	Disease causing	Simple_aae	0.999	Deleterious	-11.31*	Damaging	0.000*
rs754872940 A>C	H152R	Benign	0.014	Disease causing	Simple_aae	0.999	Deleterious	-.4.81*	Tolerated	0.061
rs549531759 G>A	Q162H	Damaging	0.994*	Disease causing	Simple_aae	0.999	Deleterious	-3.77*	Damaging	0.023*
rs764822140 C>A	Stop gained	-	-	Disease causing	Complex_aae	1	-	-	-	-
